# Supplementary material for: Frequent inactivating mutations of STAG2 in bladder cancer are associated with low tumour grade and stage and inversely related to chromosomal copy number changes
Source: PubMed Central journal article supplement (PMC3959811; doi:10.1093/hmg/ddt589), 2013-11-22
Supplement: supp_ddt589_ddt589supp_fig1.pdf [file supp_ddt589_ddt589supp_fig1.pdf]

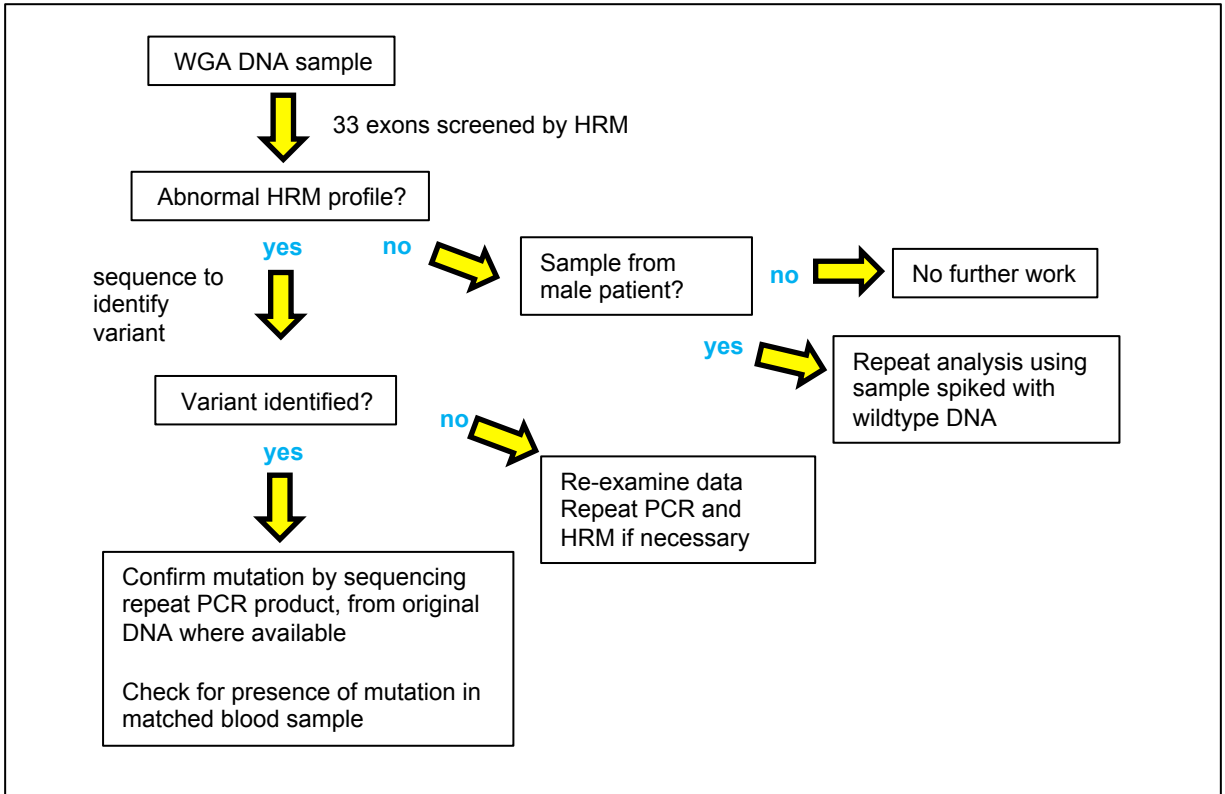

Supplementary Figure 1.
