# Supplementary material for: Frequent inactivating mutations of STAG2 in bladder cancer are associated with low tumour grade and stage and inversely related to chromosomal copy number changes
Source: PubMed Central journal article supplement (PMC3959811; doi:10.1093/hmg/ddt589), 2013-11-22
Supplement: supp_ddt589_ddt589supp_table1.pdf [file supp_ddt589_ddt589supp_table1.pdf]

Supplementary Table 1.

| Sample | Gender | Tumour Stage | Tumour Grade | Tumour Pathology | Time to recurrence (months) | Follow up time (months) - see footnote | % clones altered in aCGH | Number of whole chromosome alterations detected by aCGH | Genomic position (GRCh37) of variation | Position of variant in transcript NM_001042749 (numbered with A of ATGI as nucleotide 1) | Predicted effect of variant at primary amino acid sequence level | Effect (Splice mutations supported by RNA evidence unless indicated otherwise) | IHC   | FGFR3            | PIK3CA           | RAS         | TP53               |
|--------|--------|--------------|--------------|------------------|-----------------------------|----------------------------------------|--------------------------|---------------------------------------------------------|----------------------------------------|------------------------------------------------------------------------------------------|------------------------------------------------------------------|--------------------------------------------------------------------------------|-------|------------------|------------------|-------------|--------------------|
| 45     | M      | Ta           | G2           | TCC              | 26                          | 40                                     | 9.50                     | 1                                                       |                                        |                                                                                          |                                                                  |                                                                                | ND    | p.S249C          | WT               | WT          |                    |
| 94     | M      | T1           | G3           | TCC              | 3                           | 17                                     | 12.77                    | 1                                                       |                                        |                                                                                          |                                                                  |                                                                                | + & - | p.R248C          | WT               | WT          | WT                 |
| 95     | M      | >T2          | G2           | TCC              |                             |                                        | 14.67                    | 1                                                       |                                        |                                                                                          |                                                                  |                                                                                | ND    | WT               | WT               | WT          | WT                 |
| 110    | M      | Ta           | G3           | TCC              | 23                          | 153                                    |                          |                                                         |                                        |                                                                                          |                                                                  |                                                                                | ND    | WT               | WT               | WT          | WT                 |
| 113    | M      | Ta           | G3           | TCC              | 12                          | 18                                     | 13.49                    | 4                                                       |                                        |                                                                                          |                                                                  |                                                                                | +     | WT               | WT               | WT          | WT                 |
| 137    | M      | >T2          | G3           | TCC              | 33                          | 126                                    | 64.50                    | 3                                                       | X:123220428 C>T                        | c.3085 C>T                                                                               | p.Q1029*                                                         | Nonsense                                                                       | ND    | WT               | WT               | WT          | p.E271K            |
| 140    | F      | T1           | G3           | TCC              | 6                           | 127                                    | 14.04                    | 3                                                       | X:123220417 delT                       | c.3074 delT                                                                              | p.F1025fs                                                        | Frameshift                                                                     | ND    | WT               | p.E542K          | WT          | WT                 |
| 169    | F      | >T2          | G3           | TCC              | No recurrence               | 20                                     |                          |                                                         |                                        |                                                                                          |                                                                  |                                                                                | ND    |                  |                  |             |                    |
| 228    | M      | T1           | G3           | TCC              | 5                           | 47                                     | 19.60                    | 2                                                       |                                        |                                                                                          |                                                                  |                                                                                | +     | p.S249C          | WT               | WT          | WT                 |
| 239    | M      | Ta           | G1           | TCC              | No recurrence               | 121                                    | 0.00                     | 0                                                       |                                        |                                                                                          |                                                                  |                                                                                | +     | WT               | WT               | KRAS p.G12R | WT                 |
| 243    | M      | T1           | G3           | TCC              | No recurrence               | 7                                      | 14.61                    | 3                                                       |                                        |                                                                                          |                                                                  |                                                                                | +     | WT               | WT               | WT          | WT                 |
| 248    | F      | Ta           | G2           | TCC              | No recurrence               | 66                                     |                          |                                                         |                                        |                                                                                          |                                                                  |                                                                                | ND    |                  |                  |             |                    |
| 264    | M      | Ta           | G2           | TCC              | 8                           | 118                                    | 1.82                     | 0                                                       |                                        |                                                                                          |                                                                  |                                                                                | ND    | WT               | p.E545K          | KRAS p.G12V | WT                 |
| 271    | M      | T1           | G3           | TCC              |                             |                                        | 20.45                    | 4                                                       | X:123200222 T>C                        | c.2201 T>C                                                                               | p.L734P                                                          | Missense                                                                       | + & - | WT               | WT               | WT          | p.K132N            |
| 277    | M      | T1           | G2           | TCC              | 6                           | 61                                     |                          |                                                         |                                        |                                                                                          |                                                                  |                                                                                | ND    |                  |                  |             |                    |
| 282    | M      | Ta           | G2           | TCC              | 39                          | 84                                     |                          |                                                         |                                        |                                                                                          |                                                                  |                                                                                | ND    | p.S249C          | WT               | WT          | WT                 |
| 287    | M      | Ta           | G2           | TCC              | 9                           | 118                                    | 17.23                    | 0                                                       |                                        |                                                                                          |                                                                  |                                                                                | +     | p.S249C          | WT               | WT          | WT                 |
| 291    | F      | >T2          | G3           | TCC              | 14                          | 18                                     | 22.85                    | 2                                                       |                                        |                                                                                          |                                                                  |                                                                                | +     | WT               | WT               | WT          | WT                 |
| 299    | F      | Ta           | G2           | TCC              | No recurrence               | 44                                     | 8.24                     | 2                                                       |                                        |                                                                                          |                                                                  |                                                                                | ND    | p.S249C          | WT               | WT          | WT                 |
| 305    | M      | T1           | G3           | TCC              |                             |                                        |                          |                                                         |                                        |                                                                                          |                                                                  |                                                                                | ND    |                  |                  |             |                    |
| 312    | M      | Ta           | G2           | TCC              | 17                          | 92                                     | 10.00                    | 2                                                       |                                        |                                                                                          |                                                                  |                                                                                | +     | p.S249C          | WT               | WT          | WT                 |
| 315    | M      | T1           | G3           | TCC              | No recurrence               | 116                                    | 16.86                    | 1                                                       | X:123179050 C>T                        | c.499 C>T                                                                                | p.Q167*                                                          | Nonsense                                                                       | ND    | WT               | p.D1017H         | WT          | p.R213W or p.R213X |
| 322    | F      | Ta           | G1           | TCC              | 24                          | 47                                     |                          |                                                         | X:123191812 delinsTG                   | c.1401 delinsTG                                                                          | p.F468fs                                                         | Frameshift                                                                     | ND    | p.S249C          | WT               | WT          |                    |
| 329    | M      | >T2          | G3           | TCC              | No recurrence               | 21                                     |                          |                                                         |                                        |                                                                                          |                                                                  |                                                                                | ND    |                  |                  |             |                    |
| 339    | M      | Ta           | G2           | TCC              | 5                           | 25                                     | 8.39                     | 2                                                       | X:123200233 C>T                        | c.2212 C>T                                                                               | p.H738Y                                                          | Missense                                                                       | ND    | p.Y375C          | WT               | WT          | WT                 |
| 344    | F      | T1           | G3           | TCC              | No recurrence               | 104                                    | 20.34                    | 3                                                       |                                        |                                                                                          |                                                                  |                                                                                | ND    | p.S249C          | WT               | WT          | WT                 |
| 355    | F      | >T2          | G3           | TCC              | 14                          | 15                                     | 51.15                    | 3                                                       |                                        |                                                                                          |                                                                  |                                                                                | +     | WT               | WT               | WT          | p.R280T            |
| 356    | F      | Ta           | G2           | TCC              | 60                          | 67                                     |                          |                                                         |                                        |                                                                                          |                                                                  |                                                                                | ND    | p.S249C          | p.E542K          | WT          | WT                 |
| 358    | F      | Ta           | G2           | TCC              | No recurrence               | 111                                    | 14.76                    | 0                                                       |                                        |                                                                                          |                                                                  |                                                                                | -     | WT               | WT               | WT          | WT                 |
| 359    | F      | Ta           | G2           | TCC              | 5                           | 111                                    | 0.12                     | 0                                                       | X:123171474 G>T                        | c.385+1 G>T                                                                              | p.?                                                              | Splice (presumed)                                                              | +     | p.S249C          | WT               | WT          | WT                 |
| 360    | M      | >T2          | G3           | TCC              |                             |                                        | 26.92                    | 3                                                       |                                        |                                                                                          |                                                                  |                                                                                | +     | WT               | WT               | WT          | WT                 |
| 364    | F      | T1           | G3           | TCC              |                             |                                        | 25.88                    | 2                                                       |                                        |                                                                                          |                                                                  |                                                                                | -     | WT               | p.E545K          | KRAS p.G12S | p.E198X            |
| 366    | F      | Tx           | G2           | TCC              |                             |                                        | 17.03                    | 0                                                       |                                        |                                                                                          |                                                                  |                                                                                | +     | WT               | WT               | WT          | WT                 |
| 374    | F      | T1           | G3           | TCC              |                             |                                        | 30.49                    | 0                                                       |                                        |                                                                                          |                                                                  |                                                                                | ND    | WT               | WT               | WT          | WT                 |
| 385    | F      | T1           | G2           | TCC              | 8                           | 107                                    | 7.38                     | 0                                                       | X:123181275 C>T                        | c.739 C>T                                                                                | p.Q247*                                                          | Nonsense                                                                       | ND    | p.S249C          | WT               | WT          | WT                 |
| 393    | M      | T1           | G3           | TCC              | 11                          | 63                                     |                          |                                                         |                                        |                                                                                          |                                                                  |                                                                                | ND    | WT               | WT               | HRAS p.G12S | WT                 |
| 397    | M      | Ta           | G2           | TCC              | No recurrence               | 106                                    | 0.00                     | 0                                                       | X:123220496_123220497 dupTG            | c.3153_3154 dupTG                                                                        | p.G1052fs                                                        | Frameshift                                                                     | ND    | p.S249C          | p.E542K; p.E545K | KRAS p.G12D | WT                 |
| 406    | F      | Ta           | G2           | TCC              | No recurrence               | 106                                    | 3.69                     | 0                                                       |                                        |                                                                                          |                                                                  |                                                                                | ND    | p.S249C          | WT               | WT          | WT                 |
| 411    | M      | T1           | G3           | TCC              |                             |                                        | 71.61                    | 2                                                       |                                        |                                                                                          |                                                                  |                                                                                | ND    | WT               | WT               | WT          | WT                 |
| 417    | F      | >T2          | G3           | TCC              |                             |                                        | 23.17                    | 1                                                       | X:123197742_123197760 del19            | c.1866_1884 del19                                                                        | p.K622fs                                                         | Frameshift                                                                     | -     | WT               | p.E542K          | KRAS p.G12V | WT                 |
| 418    | F      | T1           | G3           | TCC              | No recurrence               | 105                                    | 7.55                     | 2                                                       |                                        |                                                                                          |                                                                  |                                                                                | ND    | WT               | p.E545K          | WT          | WT                 |
| 428    | M      | Tx           | G2           | TCC              | No recurrence               | 131                                    |                          |                                                         |                                        |                                                                                          |                                                                  |                                                                                | ND    | WT               | p.E545K          | WT          | WT                 |
| 433    | M      | >T2          | G3           | TCC              | 9                           | 11                                     | 19.42                    | 2                                                       |                                        |                                                                                          |                                                                  |                                                                                | +     | p.S249C; p.Y375C | WT               | WT          | WT                 |
| 438    | F      | >T2          | G3           | TCC              | No recurrence               | 14                                     | 24.29                    | 3                                                       |                                        |                                                                                          |                                                                  |                                                                                | +     | p.Y375C          | WT               | WT          | p.H214R; p.R280K   |
| 443    | F      | Ta           | G2           | TCC              | No recurrence               | 9                                      |                          |                                                         |                                        |                                                                                          |                                                                  |                                                                                | ND    | p.S249C          | WT               | WT          | WT                 |
| 445    | F      | Ta           | G3           | TCC              | 17                          | 17                                     |                          |                                                         |                                        |                                                                                          |                                                                  |                                                                                | ND    | p.S249C          | WT               | WT          | WT                 |
| 451    | M      | Ta           | G2           | TCC              | No recurrence               | 53                                     |                          |                                                         |                                        |                                                                                          |                                                                  |                                                                                | ND    |                  |                  |             |                    |
| 454    | M      | Ta           | G2           | TCC              | 14                          | 101                                    | 0.35                     | 0                                                       | X:123195666_123195667 dupGT            | c.1580_1581 dupGT                                                                        | p.T528fs                                                         | Frameshift                                                                     | +     | p.G372C          | p.E542K          | WT          | WT                 |
| 457    | M      | Ta           | G2           | TCC              |                             |                                        | 12.97                    | 2                                                       |                                        |                                                                                          |                                                                  |                                                                                | +     | p.S249C          | p.M1043I         | WT          | WT                 |
| 461    | M      | T1           | G3           | TCC              | 8                           | 104                                    | 9.19                     | 2                                                       |                                        |                                                                                          |                                                                  |                                                                                | +     | p.S249C          | WT               | WT          | WT                 |
| 466    | M      | >T2          | G3           | TCC              |                             |                                        |                          |                                                         |                                        |                                                                                          |                                                                  |                                                                                | ND    |                  |                  |             |                    |
| 468    | M      | T1           | G2           | TCC              | 36                          | 104                                    | 5.30                     | 1                                                       |                                        |                                                                                          |                                                                  |                                                                                | +     | WT               | WT               | WT          | WT                 |
| 469    | F      | Ta           | G2           | TCC              |                             |                                        |                          |                                                         |                                        |                                                                                          |                                                                  |                                                                                | ND    | WT               | WT               | NRAS p.Q61R | WT                 |
| 482    | F      | Ta           | G3           | TCC              | No recurrence               | 103                                    | 24.50                    | 4                                                       |                                        |                                                                                          |                                                                  |                                                                                | ND    | p.S249C          | WT               | WT          | WT                 |
| 487    | M      | Ta           | G2           | TCC              |                             |                                        |                          |                                                         |                                        |                                                                                          |                                                                  |                                                                                | ND    |                  |                  |             |                    |
| 489    | F      | Ta           | G3           | TCC              | No recurrence               | 103                                    | 0.00                     | 0                                                       |                                        |                                                                                          |                                                                  |                                                                                | +     | WT               | p.E545K          | WT          | WT                 |
| 491    | F      | >T2          | G3           | SCC              |                             |                                        |                          |                                                         |                                        |                                                                                          |                                                                  |                                                                                | ND    | WT               | WT               | WT          | p.E180K            |
| 494    | F      | Ta           | G2           | TCC              | No recurrence               | 103                                    | 0.32                     | 0                                                       | X:123191758_123191762 del5             | c.1347_1351 del5                                                                         | p.R451fs                                                         | Frameshift                                                                     | -     | p.S249C          | WT               | WT          | p.R273L; p.Q331X   |
| 498    | F      | >T2          | G3           | TCC              | No recurrence               | 20                                     | 16.08                    | 1                                                       |                                        |                                                                                          |                                                                  |                                                                                | ND    | WT               | WT               | WT          | WT                 |
| 500    | F      | >T2          | G3           | TCC              |                             |                                        | 12.37                    | 3                                                       | X:123220382 C>T; X:123220428 C>T       | c.3054-15 C>T; c.3085 C>T                                                                | p.(=); p.Q1029*                                                  | No effect; Nonsense                                                            | +     | p.S249C          | WT               | WT          | WT                 |
| 504    | F      | >T2          | G3           | TCC              |                             |                                        | 31.47                    | 3                                                       |                                        |                                                                                          |                                                                  |                                                                                | +     | WT               | WT               | HRAS p.G12R | WT                 |
| 511    | M      | Ta           | G3           | TCC              | 5                           | 103                                    | 18.07                    | 1                                                       | X:123220440 C>T                        | c.3097 C>T                                                                               | p.R1033*                                                         | Nonsense                                                                       | -     | p.S249C          | WT               | WT          | WT                 |
| 513    | M      | >T2          | G2           | TCC              | No recurrence               | 103                                    | 29.69                    | 1                                                       |                                        |                                                                                          |                                                                  |                                                                                | ND    | WT               | p.E542K          | WT          | WT                 |
| 518    | M      | Ta           | G2           | TCC              | No recurrence               | 102                                    | 0.00                     | 0                                                       |                                        |                                                                                          |                                                                  |                                                                                | +     | p.K652E          | p.E542K          | WT          | WT                 |
| 519    | M      | T1           | G3           | TCC              | No recurrence               | 8                                      | 32.54                    | 1                                                       |                                        |                                                                                          |                                                                  |                                                                                | ND    | p.R248C          | WT               | WT          | p.E298X            |
| 525    | M      | T1           | G3           | TCC              |                             |                                        |                          |                                                         | X:123197834 C>G                        | c.1958 C>G                                                                               | p.S653*                                                          | Nonsense                                                                       | ND    |                  |                  |             |                    |
| 529    | M      | Tx           | G2           | TCC              |                             |                                        | 14.52                    | 1                                                       | X:123224554_123224557 dup4             | c.3407_3410 dup4                                                                         | p.S1137fs                                                        | Frameshift                                                                     | ND    | p.S249C          | WT               | WT          | WT                 |
| 535    | F      | Ta           | G2           | TCC              | 8                           | 58                                     |                          |                                                         |                                        |                                                                                          |                                                                  |                                                                                | ND    | p.S249C          | WT               | WT          | WT                 |
| 536    | M      | Ta           | G2           | TCC              | 15                          | 102                                    | 0.00                     | 0                                                       | X:123200250 G>A                        | c.2229 G>A                                                                               | p.W743*                                                          | Nonsense                                                                       | -     | p.S249C          | p.E545K          | WT          | WT                 |
| 540    | M      | Ta           | G2           | TCC              | 5                           | 102                                    | 15.01                    | 2                                                       |                                        |                                                                                          |                                                                  |                                                                                | + & - | p.S249C          | WT               | WT          | WT                 |
| 554    | M      | T1           | G2           | TCC              |                             |                                        | 9.25                     | 3                                                       |                                        |                                                                                          |                                                                  |                                                                                | +     | p.S249C          | WT               | WT          | WT                 |
| 559    | M      | >T2          | G3           | TCC              | No recurrence               | 78                                     |                          |                                                         |                                        |                                                                                          |                                                                  |                                                                                | ND    |                  |                  |             |                    |
| 561    | M      | T1           | G3           | TCC              | No recurrence               | 16                                     | 11.30                    | 1                                                       |                                        |                                                                                          |                                                                  |                                                                                | +     | WT               | p.H1047R         | HRAS p.G13V | WT                 |
| 567    | M      | T1           | G3           | TCC              | 50                          | 61                                     | 31.01                    | 3                                                       |                                        |                                                                                          |                                                                  |                                                                                | +     | WT               | WT               | WT          | WT                 |
| 571    | F      | T1           | G3           | TCC              | 6                           | 36                                     | 10.69                    | 3                                                       |                                        |                                                                                          |                                                                  |                                                                                | +     | p.S249C          | WT               | WT          | WT                 |



|      |   |     |    |     |               |     |       |   |                                  |                        |                   |                      |          |         |                  |             |                                  |
|------|---|-----|----|-----|---------------|-----|-------|---|----------------------------------|------------------------|-------------------|----------------------|----------|---------|------------------|-------------|----------------------------------|
| 987  | M | T1  | G2 | TCC |               |     |       |   | X:123195067 A>G                  | c.1417-7 A>G           | p.?               | Splice               | ND       | WT      | WT               | WT          | WT                               |
| 989  | M | Ta  | G3 | TCC | 13            | 84  | 7.80  | 0 | X:123215342 A>G                  | c.2888 A>G             | p.Q963R           | Missense             | +        | WT      | WT               | WT          | WT                               |
| 990  | F | Ta  | G2 | TCC | 5             | 98  | 0.00  | 0 | X:123200229 123200240 del12      | c.2208 2219 del12      | p.C736*           | Nonsense             | ND       | p.Y375C | p.E542K          | WT          | WT                               |
| 991  | F | Tx  | G2 | TCC | No recurrence | 112 | 18.90 | 3 | X:123179176 123179193 del18      | c.625 642 del18        | p.D209_A214del    | In-frame deletion    | ND       | WT      | p.E542K          | WT          | KRAS p.G12C                      |
| 994  | F | >T2 | G3 | TCC | No recurrence | 20  |       |   |                                  |                        |                   |                      | ND       | WT      | p.E542K          | WT          | WT                               |
| 995  | M | Tx  | G2 | TCC | 24            | 91  |       |   |                                  |                        |                   |                      | ND       | p.S249C | p.H1047R         | WT          | WT                               |
| 996  | F | Ta  | G2 | TCC | 38            | 111 |       |   |                                  |                        |                   |                      | ND       |         |                  |             |                                  |
| 1005 | M | Ta  | G2 | TCC | 9             | 111 |       |   |                                  |                        |                   |                      | ND       | p.S249C | p.E542K          | WT          | WT                               |
| 1006 | M | Ta  | G2 | TCC | 6             | 30  | 7.87  | 0 |                                  |                        |                   |                      | ND       | p.S249C | WT               | WT          | p.G108R                          |
| 1009 | M | Tx  | G3 | TCC | No recurrence | 6   | 44.13 | 4 |                                  |                        |                   |                      | ND       | WT      | WT               | WT          | p.R175H                          |
| 1010 | M | T1  | G3 | TCC | No recurrence | 84  | 6.53  | 0 |                                  |                        |                   |                      | +        | WT      | WT               | WT          | HRAS p.R68P                      |
| 1014 | F | >T2 | G1 | SCC |               |     |       |   |                                  |                        |                   |                      | ND       | p.S249C | WT               | WT          | WT                               |
| 1017 | M | Ta  | G2 | TCC | 72            | 102 | 1.20  | 0 | X:123197045 G>T                  | c.1811 G>T             | p.R604L           | Missense             | ND       | p.S249C | WT               | WT          | WT                               |
| 1021 | M | T1  | G3 | TCC | No recurrence | 83  | 14.50 | 1 |                                  |                        |                   |                      | ND       | WT      | p.E545K          | WT          | p.Q331X; p.D259V                 |
| 1025 | F | T1  | G2 | TCC | 4             | 83  | 10.50 | 1 | X:123179156 C>A                  | c.605 C>A              | p.S202*           | Nonsense             | -        | WT      | WT               | WT          | WT                               |
| 1028 | M | T1  | G3 | TCC | 10            | 82  | 7.54  | 2 | X:123197049 A>C; X:123210303 C>T | c.1815A>C; c.2655 C>T  | p.L605F; p.(=)    | Missense; Synonymous | +        | WT      | WT               | WT          | WT                               |
| 1030 | M | Ta  | G2 | TCC | 7             | 9   | 20.09 | 3 |                                  |                        |                   |                      | ND       | +       | WT               | WT          | WT                               |
| 1033 | M | T1  | G3 | TCC | 4             | 22  | 24.34 | 2 |                                  |                        |                   |                      | +        | WT      | WT               | WT          | p.I195T                          |
| 1038 | M | Ta  | G2 | TCC | No recurrence | 61  | 0.00  | 0 |                                  |                        |                   |                      | ND       | p.S249C | p.E542K          | WT          | WT                               |
| 1040 | F | >T2 | G3 | SCC |               |     |       |   |                                  |                        |                   |                      | ND       |         |                  |             |                                  |
| 1043 | M | Ta  | G3 | TCC | No recurrence | 81  | 31.21 | 6 |                                  |                        |                   |                      | ND       | p.S249C | WT               | WT          | WT                               |
| 1044 | M | Ta  | G2 | TCC | 3             | 81  | 2.97  | 0 |                                  |                        |                   |                      | +        | WT      | WT               | WT          | WT                               |
| 1046 | M | Ta  | G2 | TCC | 17            | 81  | 24.01 | 2 | X:123176411 A>G                  | c.386-8 A>G            | p.?               | Splice (presumed)    | + & weak | p.S249C | WT               | WT          | WT                               |
| 1049 | F | >T2 | G3 | TCC |               |     | 42.92 | 4 |                                  |                        |                   |                      | ND       | WT      | WT               | WT          | p.Y205C                          |
| 1052 | F | T1  | G3 | TCC | 7             | 12  | 12.77 | 2 | X:123164943 G>T                  | c.256 G>T              | p.E86*            | Nonsense             | -        | p.Y375C | p.E545K          | WT          | WT                               |
| 1053 | F | Ta  | G2 | TCC | No recurrence | 1   | 0.00  | 0 | X:123202456 C>T                  | c.2308 C>T             | p.Q770*           | Nonsense             | ND       | p.Y375C | WT               | WT          | WT                               |
| 1058 | M | Ta  | G2 | TCC | No recurrence | 99  | 0.00  | 0 |                                  |                        |                   |                      | ND       | WT      | WT               | WT          | WT                               |
| 1063 | M | Ta  | G2 | TCC | 7             | 98  | 4.60  | 0 | X:123195162 delT                 | c.1505 del T           | p.L502fs          | Frameshift           | ND       | p.S373C | WT               | WT          | WT                               |
| 1066 | M | >T2 | G3 | SCC |               |     |       |   |                                  |                        |                   |                      | ND       |         |                  |             |                                  |
| 1067 | M | Ta  | G2 | TCC | 9             | 105 |       |   |                                  |                        |                   |                      | ND       | WT      | WT               | WT          | HRAS p.Q61R                      |
| 1072 | M | Ta  | G3 | TCC | 8             | 24  | 20.11 | 1 | X:123195215 T>A                  | c.1534+24 T>A          | p=-               | No effect            | + & -    | WT      | WT               | WT          | WT                               |
| 1073 | M | Ta  | G3 | TCC | 7             | 15  | 23.22 | 5 | X:123215302 G>A                  | c.2848 G>A             | p.E950K           | Missense             | ND       | WT      | WT               | WT          | WT                               |
| 1079 | F | Ta  | G3 | TCC | No recurrence | 78  | 12.72 | 1 | X:123210190 C>T                  | c.2542 C>T             | p.Q848*           | Nonsense             | ND       | p.R248C | p.E545K          | WT          | WT                               |
| 1081 | F | T1  | G3 | TCC | No recurrence | 78  | 0.00  | 0 | X:123224511 dupA                 | c.3364 dupA            | p.T1122fs         | Frameshift           | ND       | p.A393E | p.H1047R         | WT          | p.Y234H                          |
| 1082 | F | Ta  | G3 | TCC | No recurrence | 78  | 17.72 | 3 |                                  |                        |                   |                      | +        | WT      | WT               | WT          | WT                               |
| 1083 | M | Ta  | G2 | TCC | No recurrence | 4   |       |   | X:123215276 C>G                  | c.2822 C>G             | p.S941*           | Nonsense             | ND       | p.S249C | WT               | WT          | WT                               |
| 1088 | M | Ta  | G2 | TCC | No recurrence | 44  |       |   |                                  |                        |                   |                      | ND       | WT      | WT               | WT          | WT                               |
| 1090 | F | Ta  | G2 | TCC | 4             | 39  |       |   |                                  |                        |                   |                      | ND       | WT      | WT               | WT          | WT                               |
| 1091 | M | Ta  | G2 | TCC | 3             | 22  | 15.00 | 1 |                                  |                        |                   |                      | ND       | p.S249C | p.E545K          | WT          | WT                               |
| 1094 | F | T1  | G3 | TCC | No recurrence | 77  | 13.72 | 2 | X:123227933 C>G                  | c.3644 C>G             | p.S1215*          | Nonsense             | + & -    | p.S249C | WT               | WT          | WT                               |
| 1096 | M | Ta  | G2 | TCC | No recurrence | 16  | 4.89  | 1 |                                  |                        |                   |                      | ND       | p.Y375C | WT               | WT          | WT                               |
| 1103 | M | Ta  | G3 | TCC | No recurrence | 76  | 0.23  | 0 |                                  |                        |                   |                      | +        | WT      | p.E542K; p.E545K | WT          | WT                               |
| 1109 | M | >T2 | G3 | TCC | 51            | 60  | 21.32 | 0 |                                  |                        |                   |                      | +        | WT      | WT               | WT          | WT                               |
| 1111 | M | Ta  | G3 | TCC | No recurrence | 98  |       |   | X:123217323 C>T; X:123220428 C>T | c.2977 C>T; c.3085 C>T | p.P993S; p.Q1029* | Missense; Nonsense   | ND       | p.Y375C | p.E545K          | WT          | KRAS p.G12D                      |
| 1116 | F | Ta  | G2 | TCC | 48            | 87  | 0.00  | 0 | X:123191785 delC                 | c.1374 delC            | p.N459fs          | Frameshift           | ND       | p.S249C | WT               | WT          | WT                               |
| 1117 | M | Ta  | G2 | TCC | 7             | 25  | 0.00  | 0 |                                  |                        |                   |                      | ND       | WT      | p.E542K          | WT          | HRAS p.Q61R                      |
| 1118 | M | T1  | G3 | TCC | 12            | 75  | 12.31 | 1 |                                  |                        |                   |                      | +        | p.R248C | p.E545K          | WT          | WT                               |
| 1126 | M | >T2 | G3 | TCC | No recurrence | 8   | 42.92 | 0 |                                  |                        |                   |                      | +        | WT      | WT               | WT          | p.E68D; p.A76V; p.R337C          |
| 1129 | M | T1  | G3 | TCC | No recurrence | 74  | 14.47 | 0 |                                  |                        |                   |                      | +        | WT      | WT               | NRAS p.Q61L | WT                               |
| 1130 | M | Ta  | G3 | TCC |               |     | 17.90 | 1 |                                  |                        |                   |                      | ND       | p.S249C | p.E545K          | WT          | WT                               |
| 1135 | M | Ta  | G3 | TCC |               |     |       |   | X:123191812 delinsTG             | c.1401 delinsTG        | p.F468fs          | Frameshift           | ND       | WT      | p.E545K          | WT          | WT                               |
| 1138 | M | T1  | G3 | TCC | No recurrence | 73  | 16.74 | 0 |                                  |                        |                   |                      | +        | WT      | WT               | WT          | WT                               |
| 1142 | M | Ta  | G2 | TCC | 18            | 92  | 0.00  | 0 | X:123210178 123210198 del21      | c.2534-4 2550 del21    | p.?               | Splice               | ND       | p.S249C | p.E545K          | WT          | WT                               |
| 1144 | M | Ta  | G2 | TCC | No recurrence | 92  | 0.00  | 0 |                                  |                        |                   |                      | ND       | WT      | WT               | WT          | HRAS p.Q61R                      |
| 1145 | M | T1  | G3 | TCC | No recurrence | 73  | 28.74 | 1 | X:123171455 C>T                  | c.367 C>T              | p.Q123*           | Nonsense             | -        | WT      | WT               | WT          | WT                               |
| 1148 | F | >T2 | G3 | TCC | No recurrence | 24  | 24.68 | 5 |                                  |                        |                   |                      | +        | WT      | WT               | WT          | p.E271K; p.N310fs                |
| 1150 | M | Ta  | G3 | TCC |               |     |       |   |                                  |                        |                   |                      | ND       |         |                  |             |                                  |
| 1152 | M | >T2 | G3 | TCC |               |     |       |   |                                  |                        |                   |                      | ND       |         |                  |             |                                  |
| 1153 | M | T1  | G3 | TCC | 3             | 19  | 8.75  | 1 |                                  |                        |                   |                      | +        | p.R248C | WT               | WT          | Splicing error (c.672+1G>T)      |
| 1157 | M | T1  | G3 | TCC |               |     | 10.64 | 0 |                                  |                        |                   |                      | +        | p.S249C | WT               | WT          | WT                               |
| 1161 | M | T1  | G3 | TCC | No recurrence | 8   | 11.39 | 2 |                                  |                        |                   |                      | +        | p.S249C | p.E545K          | WT          | WT                               |
| 1165 | F | >T2 | G3 | SCC |               |     |       |   |                                  |                        |                   |                      | ND       |         |                  |             |                                  |
| 1167 | F | Ta  | G2 | TCC | No recurrence | 84  | 0.00  | 0 | X:123176440 123176447 del8       | c.407 414 del8         | p.F136fs          | Frameshift           | ND       | p.G372C | WT               | WT          | WT                               |
| 1172 | F | >T2 | G3 | TCC |               |     |       |   | X:123229288 A>G                  | c.3772 A>G             | p.M1258V          | Missense             | ND       |         |                  |             |                                  |
| 1175 | M | Ta  | G2 | TCC | 16            | 16  | 11.40 | 1 | X:123185248 A>G                  | c.1196+4 A>G           | p.?               | Splice               | ND       | p.G372C | WT               | WT          | WT                               |
| 1176 | F | >T2 | G3 | TCC |               |     |       |   |                                  |                        |                   |                      | ND       |         |                  |             |                                  |
| 1177 | M | Ta  | G2 | TCC | 3             | 90  | 0.00  | 0 |                                  |                        |                   |                      | ND       | WT      | WT               | WT          | HRAS p.G12S                      |
| 1180 | F | >T2 | G3 | TCC |               |     |       |   |                                  |                        |                   |                      | ND       | WT      | WT               | WT          | WT                               |
| 1185 | F | Tx  | G2 | TCC | 34            | 35  | 0.00  | 0 | X:123202427 delinsCT             | c.2279 delinsCT        | p.R760fs          | Frameshift           | ND       | p.Y375C | p.H1047L         | WT          | WT                               |
| 1202 | M | >T2 | G3 | SCC |               |     |       |   |                                  |                        |                   |                      | ND       | WT      | WT               | WT          | WT                               |
| 1207 | M | >T2 | G3 | SCC |               |     |       |   |                                  |                        |                   |                      | ND       |         |                  |             |                                  |
| 1210 | F | T1  | G3 | TCC | 8             | 70  | 20.20 | 2 | X:123200024 G>A                  | c.2097-1 G>A           | p.?               | Splice               | -        | WT      | WT               | WT          | WT                               |
| 1212 | M | T1  | G3 | TCC | No recurrence | 10  | 29.20 | 3 |                                  |                        |                   |                      | +        | WT      | WT               | WT          | p.T140-Q144Del; p.E224K; p.C238Y |
| 1213 | F | Ta  | G2 | TCC |               |     | 4.90  | 1 |                                  |                        |                   |                      | ND       | p.S249C | p.H1047L         | WT          | WT                               |
| 1214 | F | Ta  | G2 | TCC | 4             | 89  | 0.30  | 0 | X:123200023 A>G                  | c.2097-2 A>G           | p.?               | Splice (presumed)    | ND       | p.S249C | WT               | WT          | WT                               |
| 1220 | M | T1  | G2 | TCC |               |     | 1.01  | 1 |                                  |                        |                   |                      | +        | p.S249C | WT               | WT          | WT                               |
| 1229 | M | T1  | G3 | TCC | 6             | 12  | 15.10 | 0 |                                  |                        |                   |                      | +        | p.S249C | WT               | WT          | WT                               |
| 1230 | M | T1  | G3 | TCC | 11            | 68  | 15.74 | 2 |                                  |                        |                   |                      | +        | p.S249C | WT               | WT          | WT                               |
| 1231 | M | Ta  | G2 | TCC | No recurrence | 24  | 2.00  | 0 | X:123176495 G>C                  | c.462 G>C              | p.?               | Splice               | ND       | p.R248C | p.H1047R         | WT          | WT                               |
| 1234 | M | T1  | G3 | TCC | 53            | 68  | 24.60 | 1 |                                  |                        |                   |                      | +        | WT      | WT               | WT          | p.M246I                          |
| 1238 | M | Ta  | G2 | TCC | No recurrence | 87  | 0.00  | 0 |                                  |                        |                   |                      | ND       | p.S249C | p.E545K          | WT          | WT                               |
| 1240 | M | T1  | G3 | TCC | No recurrence | 5   | 10.07 | 2 |                                  |                        |                   |                      | ND       | WT      | WT               | WT          | KRAS p.G12R                      |
