# Supplementary material for: Frequent inactivating mutations of STAG2 in bladder cancer are associated with low tumour grade and stage and inversely related to chromosomal copy number changes
Source: PubMed Central journal article supplement (PMC3959811; doi:10.1093/hmg/ddt589), 2013-11-22
Supplement: supp_ddt589_ddt589supp_table4.pdf [file supp_ddt589_ddt589supp_table4.pdf]

Supplementary Table 4. RT-PCR analysis of splicing mutations.

| Sample   | Splice site affected by mutation | cDNA                             | Primers used in RT-PCR reactions                                       | Experimentally determined effect (RT-PCR and sequencing of RT product)                                                                                                                                                                                                                                                               | RNA level description of mutation based on RT-PCR findings       | Protein level description of mutation based on RT-PCR findings |
|----------|----------------------------------|----------------------------------|------------------------------------------------------------------------|--------------------------------------------------------------------------------------------------------------------------------------------------------------------------------------------------------------------------------------------------------------------------------------------------------------------------------------|------------------------------------------------------------------|----------------------------------------------------------------|
| 359      | exon 7 5' splice site            | c.385+1 G>T                      | n/d                                                                    | RNA not available. Mutation predicted to destroy splice site and could cause skipping of exon 7, use of local cryptic splice site or both.                                                                                                                                                                                           | Presumed change(s): r.(289_385 del 97) and/or r.(385_386 ins86). | Presumed change(s): p.(S97fs) and/or p.G129fs.                 |
| 578      | exon 32 3' splice site           | c.3278-3_3296 del22              | Fwd 5'-ggaagtggtgagggcatg-3'<br>Rev 5'-tgcctgtcttctctgttg-3'           | No normal-sized product produced. One smaller band from use of a cryptic 3' splice site in exon 32 and one larger band from both use of the cryptic 3' splice site and retention of intron 32.                                                                                                                                       | r.3278_3302 del25                                                | p.T1093fs                                                      |
| 670      | exon 28 5' splice site           | c.2775+2 del T                   | Fwd 5'-tcagcatttttaagctaattg-3'<br>Rev 5'-aagcaaacgtcgagcaagt-3'       | Skipping of exon 28.                                                                                                                                                                                                                                                                                                                 | r.2674_2775 del102                                               | p.Y892_Q925del                                                 |
| 736      | exon 23 3' splice site           | c.2097-3 C>G                     | Fwd 5'-gatttttcaagagggtgaa-3'<br>Rev 5'-gcaagtgccaaggattaca-3'         | The mutation destroys the real exon 23 3' splice site and introduces a new cryptic 3' splice site located 2 nucleotides upstream of the real site.                                                                                                                                                                                   | r.2096_2097 ins ag                                               | p.N699fs                                                       |
| 860      | final nucleotide of exon 26      | c.2533 G>A                       | Fwd 5'-caacattacctgaccaactgaa-3'<br>Rev 5'-actgttctctcttctgtct-3'      | Skipping of exon 26 is major product. Some product retaining exon 26 with mutated nucleotide at c.2533 also detected, suggesting this mutation acts as both splice and missense.                                                                                                                                                     | r.2359_2533 del175 and r.2533 g>a                                | p.A787fs and p.D845N                                           |
| 945      | exon 24 5' splice site           | c.2256_2265+16 del 26            | Fwd 5'-cattgaagaggactcactgtttt-3'<br>Rev 5'-acagttagtattcactgttgtag-3' | Skipping of exon 24.                                                                                                                                                                                                                                                                                                                 | r.2185_2265 del81                                                | p.I729_K755del                                                 |
| 961      | exon 22 3' splice site           | c.2026-1 G>T                     | Fwd 5'-gacgattagaaaagcatttg-3'<br>Rev 5'-catggcattatgaaaagca-3'        | Use of a cryptic 3' splice site located in exon 22 which results in the deletion of nucleotides c.2026_2032. Compare with UM-UC14.                                                                                                                                                                                                   | r.2026_2032del7                                                  | p.G676fs                                                       |
| 987      | close to exon 17 3' splice site  | c.1417-7 A>G                     | Fwd 5'-tccaaatgccaactgttaaga-3'<br>Rev 5'-tcagccctgttctaatggt-3'       | Use of a cryptic 3' splice site in intron 16 created by the mutation.                                                                                                                                                                                                                                                                | r.1416_1417 ins uuuuag                                           | p.L473fs                                                       |
| 1046     | close to exon 8 3' splice site   | c.386-8 A>G                      | n/d                                                                    | RNA not available. Predict use of cryptic 3' splice site introduced by mutation.                                                                                                                                                                                                                                                     | Presumed change r.(385_386 ins auuucag)                          | Presumed change p.(G129fs)                                     |
| 1072     | intron 17                        | c.1534+24 T>A                    | Fwd 5'-gttccaaatgccaactgtt-3'<br>Rev 5'-tttctgtcccttctccac-3'          | No evidence for abnormal splicing.                                                                                                                                                                                                                                                                                                   | No evidence for abnormal splicing.                               | No evidence for abnormal splicing.                             |
| 1142     | exon 27 3' splice site           | c.2534-4_2550 del21              | Fwd 5'-tcattgctgagtgagttctc-3'<br>Rev 5'-agggtttagcacactgaattt-3'      | Skipping of exon 27.                                                                                                                                                                                                                                                                                                                 | r.2534_2673 del140                                               | p.D845fs                                                       |
| 1175     | exon 14 5' splice site           | c.1196+4 A>G                     | Fwd 5'-tcttactgctctacaaggct-3'<br>Rev 5'-gccggtgagctgaataaac-3'        | Uses cryptic 5' splice site located 4 nt downstream of real exon 14 5' splice site, resulting in the insertion of the first 4 nt of mutant intron 14 between exons 14 and 15.                                                                                                                                                        | r.1196_1197 ins guag                                             | p.S400*                                                        |
| 1210     | exon 23 3' splice site           | c.2097-1 G>A                     | Fwd 5'-gatttttcaagagggtgaa-3'<br>Rev 5'-gcaagtgccaaggattaca-3'         | Skipping of exon 23.                                                                                                                                                                                                                                                                                                                 | r.2097_2184 del88                                                | p.N699fs                                                       |
| 1214     | exon 23 3' splice site           | c.2097-2 A>G                     | n/d                                                                    | RNA not available. Predict use of cryptic splice site within exon 23 and/or skipping of exon 23 as in 94-10 which has the same mutation.                                                                                                                                                                                             | Presumed changes [r.(2097_2115 del19), r.(2097_2184 del 88)]     | Presumed changes [p.(A700fs), p.(N699fs)]                      |
| 1231     | final nucleotide of exon 8       | c.462 G>C                        | Fwd 5'-agtcggtgtagatgattgga-3'<br>Rev 5'-cagccatgtaagtgataatc-3'       | Skipping of exon 8.                                                                                                                                                                                                                                                                                                                  | r.386_462 del177                                                 | p.V130*                                                        |
| 1273     | exon 29 5' splice site           | c.2924+1 G>A                     | Fwd 5'-tcagcatttttaagctaattg-3'<br>Rev 5'-taaagtgtagtctctccc-3'        | Skipping of exon 29.                                                                                                                                                                                                                                                                                                                 | r.2776_2924 del149                                               | p.L926fs                                                       |
| 1345     | exon 18 3' splice site           | c.1535-40_1566 del72             | Fwd 5'-gatagcatgtggactgtgc-3'<br>Rev 5'-tgtctctatcatccaactgtgtc-3'     | No normal-sized product produced. Faint bands on agarose gel did not produce sequence and are probably background. The mutation deletes the exon 18 3' splice site and as there are no local cryptic 3' splice sites, it is possible that one or both of the flanking introns is retained, producing a product too large to amplify. | r.0                                                              | p.0                                                            |
| 1383     | exon 12 5' splice site           | c.1017+1_1017+22 delins CATCTTAC | Fwd 5'-aaaatgattgaaacagagcca-3'<br>Rev 5'-agcctttagagcagtaaga-3'       | Use of cryptic 5' splice site in intron 12. Inserts nucleotides from intron 12 between exons 12 and 13.                                                                                                                                                                                                                              | r.1017_1018 ins65                                                | p.Q340fs                                                       |
| 94-10    | exon 23 3' splice site           | c.2097-2 A>G                     | Fwd 5'-gatttttcaagagggtgaa-3'<br>Rev 5'-gcaagtgccaaggattaca-3'         | Major product uses a cryptic 3' splice site in exon 23. Minor product skips exon 23                                                                                                                                                                                                                                                  | r.2097_2115 del19 and r.2097_2184 del 88                         | p.A700fs and p.N699fs                                          |
| UM-UC14  | exon 22 3' splice site           | c.2026-1 G>T                     | Fwd 5'-gacgattagaaaagcatttg-3'<br>Rev 5'-catggcattatgaaaagca-3'        | Use of a cryptic 3' splice site located in exon 22 which results in the deletion of nucleotides c.2026_2032. Also has use of a cryptic 3' splice site located in intron 21 which results in the insertion of 71 nucleotides between exons 21 and 22.                                                                                 | r.2026_2032 del7 and r.2025_2026 ins71                           | Both abnormal RNA products result in p.G676fs                  |
| VM-CUB-1 | exon 28 3' splice site           | c.2674-6_2686 dup                | Fwd 5'-tcagcatttttaagctaattg-3'<br>Rev 5'-aagcaaacgtcgagcaagt-3'       | Skipping of exon 28.                                                                                                                                                                                                                                                                                                                 | r.2674_2775 del102                                               | p.Y892_Q925del                                                 |
| VM-CUB-3 | exon 7 3' splice site            | c.289-2 A>G                      | Fwd 5'-gtccaaacgaaatgaatggtc-3'<br>Rev 5'-gtctaaacatttctgtgaca-3'      | Use of cryptic 3' splice site in exon 7.                                                                                                                                                                                                                                                                                             | r.289_298 del10                                                  | p.S97fs                                                        |
